# Supplementary material for: Defining International Critical Care Pharmacist Contributions to Sepsis and Exploring Variability
Source: Springer Nature journal article supplement (doi:10.1007/s11908-023-00825-5), 2023-12-20
Supplement: MOESM1 [file 11908_2023_825_MOESM1_ESM.pdf]

## *Current Infectious Disease Reports*

# Defining international critical care pharmacist contributions to sepsis and exploring variability

Robert Oakley<sup>1,2</sup>, Sarraa Al-Mahdi<sup>3</sup>, Sonja Guntschnig<sup>4</sup>, Ha Trinh<sup>1</sup>, Dr Marco Custodio<sup>5</sup>, Sarah Korshid<sup>1</sup>, Professor Andries Gous<sup>6</sup>, Dr Dagan O Lonsdale<sup>2,7</sup>

Corresponding author: Mr Robert Oakley, [robert.oakley@nhs.net](mailto:robert.oakley@nhs.net), <https://orcid.org/0000-0001-6329-8658>

1. Pharmacy Department, St George's University Hospitals NHS Foundation Trust, Blackshaw Road, Tooting, London, SW17 0QT, United Kingdom (UK)
2. Clinical Pharmacology Department, St George's, University of London, Cranmer Terrace, London, SW17 0RE, UK
3. Pharmacy Department, London North West University Healthcare NHS Trust, Watford Road, Harrow, HA1 3UJ, UK
4. Pharmacy Department, Tauernkliniken, Zell am See, Paracelsusstraße 8, 5700, Austria
5. Pharmacy Department, Chesapeake Regional Medical Center, 736 Battlefield Blvd, North Chesapeake, VA 23320, United States of America (USA)
6. Pharmacy Department, Sefako Makgatho Health Science University, Molotlegi Street, Ga-rankuwa 0204, South Africa
7. Critical Care Directorate, St George's University Hospitals NHS Foundation Trust, Blackshaw Road, London, SW17 0QT England

**Online Resource 1 (Supplementary Table).** An overview of themes, sub-themes, and codes for Clinical Pharmacy Service Characteristics: Sources of Variability in National Intensive Care Unit (ICU) Clinical Pharmacy Services

| Themes       | Determinants                |                                 |                                                 |                                                                                                        |                                                                                           | Recruitment                                                         |                                         |
|--------------|-----------------------------|---------------------------------|-------------------------------------------------|--------------------------------------------------------------------------------------------------------|-------------------------------------------------------------------------------------------|---------------------------------------------------------------------|-----------------------------------------|
| Sub-themes   | <i>Funding</i>              | <i>Legislative</i>              | <i>Population</i>                               | <i>Workforce</i>                                                                                       | <i>Perceptions</i>                                                                        | <i>Qualifications</i>                                               | <i>Experience</i>                       |
| <b>Codes</b> | Hospital Funding            | Regional Decision Making        | Patient Factors                                 | Staffing                                                                                               | Pharmacist Skillset                                                                       | Post-graduate Diploma in Clinical Pharmacy                          | Hospital Residency Programme Components |
|              | National Funding            | Scope of Practice               | ICU Size                                        | Dispensing and Technical Requirements                                                                  | Pharmacist as a Multidisciplinary Team (MDT) Member                                       | Post-Graduate Master's in Clinical Pharmacy                         | Exposure to ICU Related Specialties     |
|              | Public or Private Sector    | National ICU Service Standards  |                                                 | University Affiliation                                                                                 | Hospital, Medical, Pharmacy Culture                                                       |                                                                     | Recognised Hospital Training Programmes |
|              | Evidence of Cost-Avoidance  |                                 |                                                 |                                                                                                        | Public and Politicians                                                                    |                                                                     | Evidence of ICU Competency              |
|              |                             |                                 |                                                 |                                                                                                        | National, Regional and Local Decision Makers                                              |                                                                     | Clinical Pharmacy Background            |
| Themes       | Service Provision           |                                 |                                                 |                                                                                                        |                                                                                           |                                                                     |                                         |
| Sub-themes   | <i>Constituents</i>         |                                 |                                                 |                                                                                                        | <i>Delivery</i>                                                                           |                                                                     |                                         |
| <b>Codes</b> | Medicines Reconciliation    | Antimicrobial Stewardship (AMS) |                                                 |                                                                                                        | Non-bedside                                                                               | Bedside                                                             | Out of Hours (OOH)/Weekends             |
|              |                             | Drug Dosing                     | Antimicrobial choice                            | Monitoring                                                                                             | a) Remote advice (reactive, proactive, multiple areas (ICU/other wards/ other hospitals)) | a) Physical Presence (MDT ward rounds, interpersonal communication) | a) Seven-Day Service                    |
|              | a) Medicines History Taking | a) Licensed                     | a) Restriction (policy or patient factor based) | a) Therapeutic Drug Monitoring (TDM) (antimicrobial choice, unlicensed or licensed dosing adjustments) | b) Guidelines/Policy (sharing between hospitals, creation based on local/national data)   | b) Shared Ward Commitments                                          | b) Reduced Service                      |
|              |                             |                                 | b) Selection                                    |                                                                                                        |                                                                                           |                                                                     | c) No service                           |

|  |                                      |                |                                                                                                                                                                               |                                       |                                                                                                                                                         |                                                   |  |
|--|--------------------------------------|----------------|-------------------------------------------------------------------------------------------------------------------------------------------------------------------------------|---------------------------------------|---------------------------------------------------------------------------------------------------------------------------------------------------------|---------------------------------------------------|--|
|  | b) Medicines History Rationalisation | b) Un-licensed | Patient factors (antimicrobial history, allergies, organ function, biochemistry, microbiological cultures and sensitivities, local/national guidelines, administration route) | b) Surviving Sepsis Campaign Guidance | c) Reporting (antimicrobial use (defined daily doses (DDD)/days of therapy (DOTS)), electronic prescribing and medicines administration (ePMA) capture) | c) Prioritisation to ICU or Other Areas           |  |
|  | c) Allergy Checking                  |                |                                                                                                                                                                               |                                       | d) Academic Activities                                                                                                                                  | d) Prescribing (independent and/or supplementary) |  |
|  |                                      |                |                                                                                                                                                                               |                                       |                                                                                                                                                         | e) Type of AMS Activities                         |  |
